Correction

# Correction: Age-Related Decrease in the Mitochondrial Sirtuin Deacetylase Sirt3 Expression Associated with ROS Accumulation in the Auditory Cortex of the Mimetic Aging Rat Model

The PLOS ONE Staff

There is an error in Figures 6, 7, and 8, which were swapped during production. Please view the correct figures and the corresponding figure legends here:

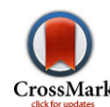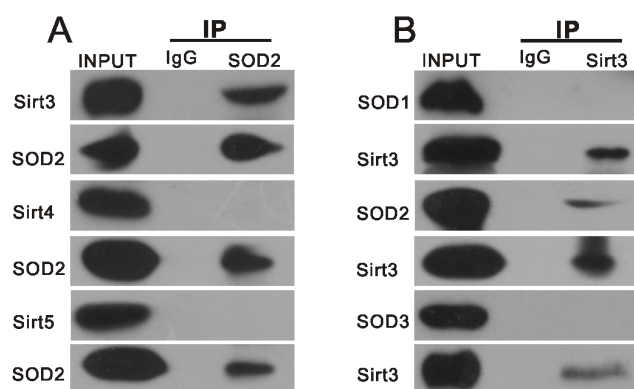

**Figure 6. Physical interaction between SOD2 and Sirt3 in the auditory cortex.** A. Endogenous SOD2 was immunopurified from the auditory cortex with anti-SOD2 antibody, followed by western blotting with anti-SIRT3, anti-Sirt4 and anti-Sirt5 antibodies. B. Endogenous Sirt3 was immunopurified from the auditory cortex with anti-Sirt3 antibody, followed by western blotting with anti-SOD2, anti-SOD1 and anti-SOD3 antibodies.

doi:10.1371/journal.pone.0088019.g001

**Citation:** The PLOS ONE Staff (2014) Correction: Age-Related Decrease in the Mitochondrial Sirtuin Deacetylase Sirt3 Expression Associated with ROS Accumulation in the Auditory Cortex of the Mimetic Aging Rat Model. PLoS ONE 9(5): e98726. doi:10.1371/journal.pone.0098726

**Published:** May 23, 2014

**Copyright:** © 2014 The PLOS ONE Staff. This is an open-access article distributed under the terms of the Creative Commons Attribution License, which permits unrestricted use, distribution, and reproduction in any medium, provided the original author and source are credited.

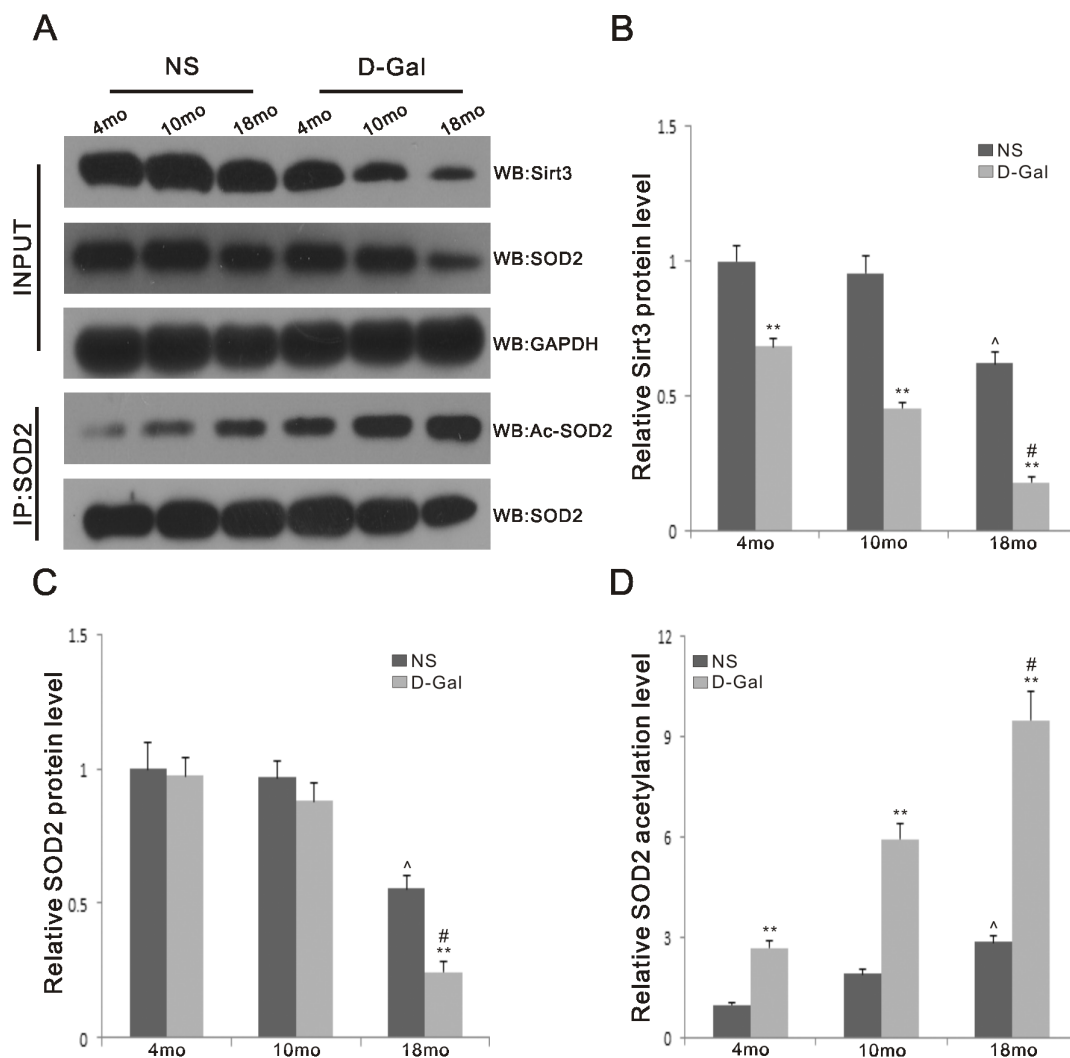

**Figure 7. Protein levels of Sirt3 and SOD2 and acetylation levels of SOD2 in the auditory cortex.** A. Top panels: Western blotting analysis of Sirt3 and SOD2 in the auditory cortex from the 4-, 10- and 18-month-old rats in the NS and D-Gal groups. GAPDH was used as a reference. Lower panels: Endogenous acetylated SOD2 was isolated by immunoprecipitation with anti-SOD2 antibody followed by western blotting with anti-acetyl-lysine antibody. SOD2 was used as a reference. (n = 6 per subgroup) B. Quantification of the amounts of total Sirt3 protein (Fig. 7B) from (Fig. 7A). The levels of Sirt3 protein were significantly decreased in the D-Gal groups compared to the NS groups, as well as in the 18-month-old groups compared to the 4-month-old groups. C. Quantification of the amounts of total SOD2 protein (Fig. 7C) from (Fig. 7A). The levels of SOD2 protein was significantly decreased between the 18-month-old D-Gal and NS groups. Significant differences were also found between the 4- and 18-month-old groups. D. Quantification of the amounts of SOD2 acetylation (Fig. 7D) from (Fig. 7A). The levels of SOD2 acetylation were significantly increased in the D-Gal groups compared to the NS groups, as well as in the 18-month-old groups compared to the 4-month-old groups. \*\*Significantly different from the NS groups ( $P < 0.01$ ). ^Significantly different from the 4-month-old NS group ( $P < 0.01$ ). #Significantly different from the 4-month-old D-Gal group ( $P < 0.01$ ). doi:10.1371/journal.pone.0088019.g002

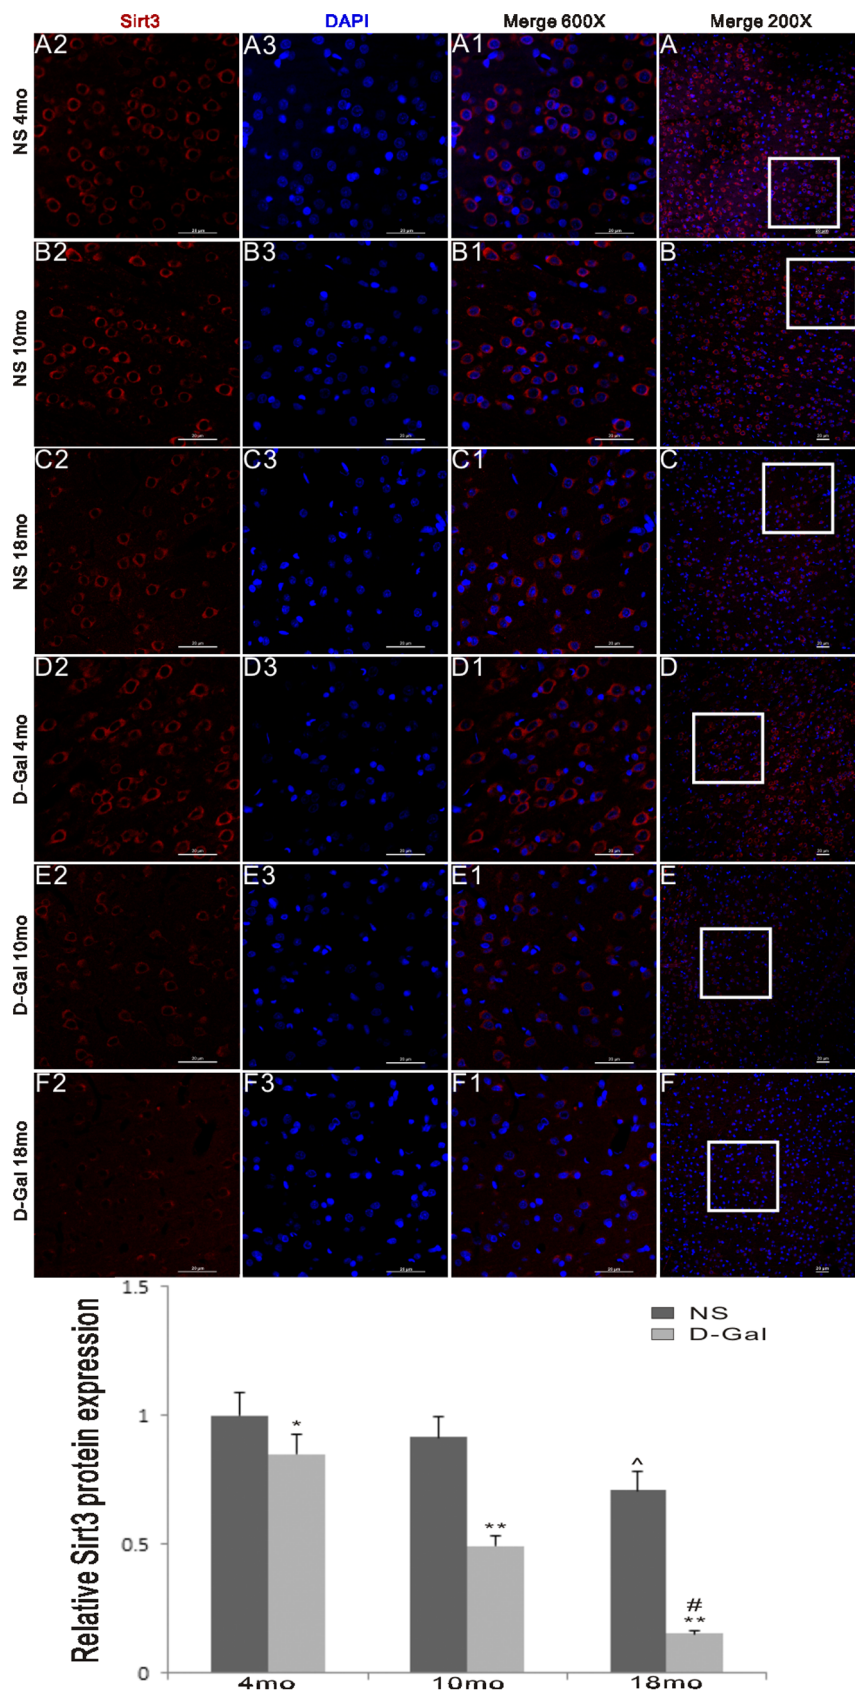

**Figure 8. Sirt3 protein expression in the auditory cortex.** An immunofluorescence assay was used to measure the effects of age and D-Gal on Sirt3 protein expression in the auditory cortex. The levels of Sirt3 protein expression in the D-Gal groups were significantly lower compared to the NS groups. The levels were also decreased in the 18-month-old groups compared to the 4-month-old groups. doi:10.1371/journal.pone.0088019.g003

## Reference

1. Zeng L, Yang Y, Hu Y, Sun Y, Du Z, et al. (2014) Age-Related Decrease in the Mitochondrial Sirtuin Deacetylase Sirt3 Expression Associated with ROS Accumulation in the Auditory Cortex of the Mimetic Aging Rat Model. PLoS ONE 9(2): e88019. doi:10.1371/journal.pone.0088019
